# Supplementary material for: Prophylactic endotracheal intubation in critically ill patients with upper gastrointestinal bleed: A systematic review and meta‐analysis
Source: PubMed Central journal article supplement (PMC7008165; doi:10.1002/jgh3.12195), 2019-05-24

**Supplementary Figure 5: Sensitivity analysis cardiac complications and prophylactic intubation in UGIB. CI indicated confidence interval(s) and M-H, Mantel-Haenszel odds ratio.**

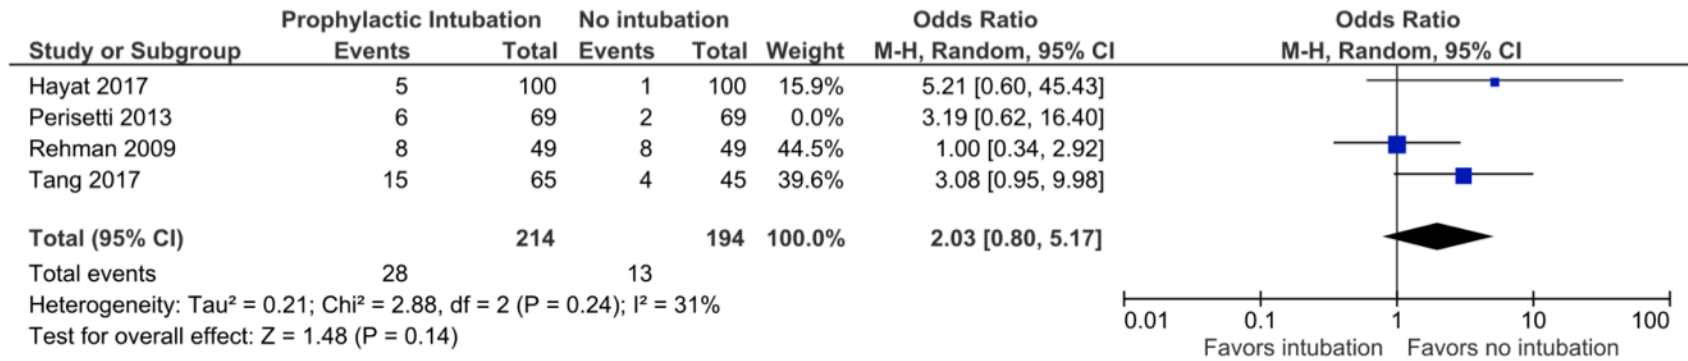

Supplement: JGH3-4-22-s006.pdf [file JGH3-4-22-s006.pdf]
